# Supplementary material for: Nonlinear optical properties of CsPbI3: synthesis, characterization, and application in passively Q-switched lasers
Source: Royal Society of Chemistry journal article supplement (doi:10.1039/d4tc05393a), 2025-01-01
Supplement: d4tc05393a1.pdf [file d4tc05393a1.pdf]

## Supporting Information

# Nonlinear Optical Properties of CsPbI<sub>3</sub>: Synthesis, Characterization, and Application in Passively Q-Switched Lasers

Muhammad Sohail <sup>a, b</sup>, Zulfiqar Ali <sup>a, b</sup>, M. Sohail <sup>c</sup>, Areej S. Alqarni <sup>d</sup>, Intikhab Alam <sup>a, b</sup>, Nimra Razzaq <sup>a, b</sup>, Fazl ullah <sup>a, b</sup>, Qiuyun Ouyang <sup>a, b\*</sup>

<sup>a</sup> Key Laboratory of Photonic Materials and Devices Physics for Oceanic Applications, Ministry of Industry and Information Technology of China, College of Physics and Optoelectronic Engineering, Harbin Engineering University, Harbin, 150001, China

<sup>b</sup> Key Laboratory of In-Fiber Integrated Optics of Ministry of Education, College of Physics and Optoelectronic Engineering, Harbin Engineering University, Harbin, 150001, China

<sup>c</sup> International Collaborative Laboratory of 2D Material for Optoelectronics Science and Technology of Ministry of Education, Institute of Microscale Optoelectronics, Shenzhen University, Shenzhen, 518060, China

<sup>d</sup> Department of Physics, College of Science, Princess Nourah Bint Abdulrahman University, P.O. Box 84428, Riyadh 11671, Saudi Arabia

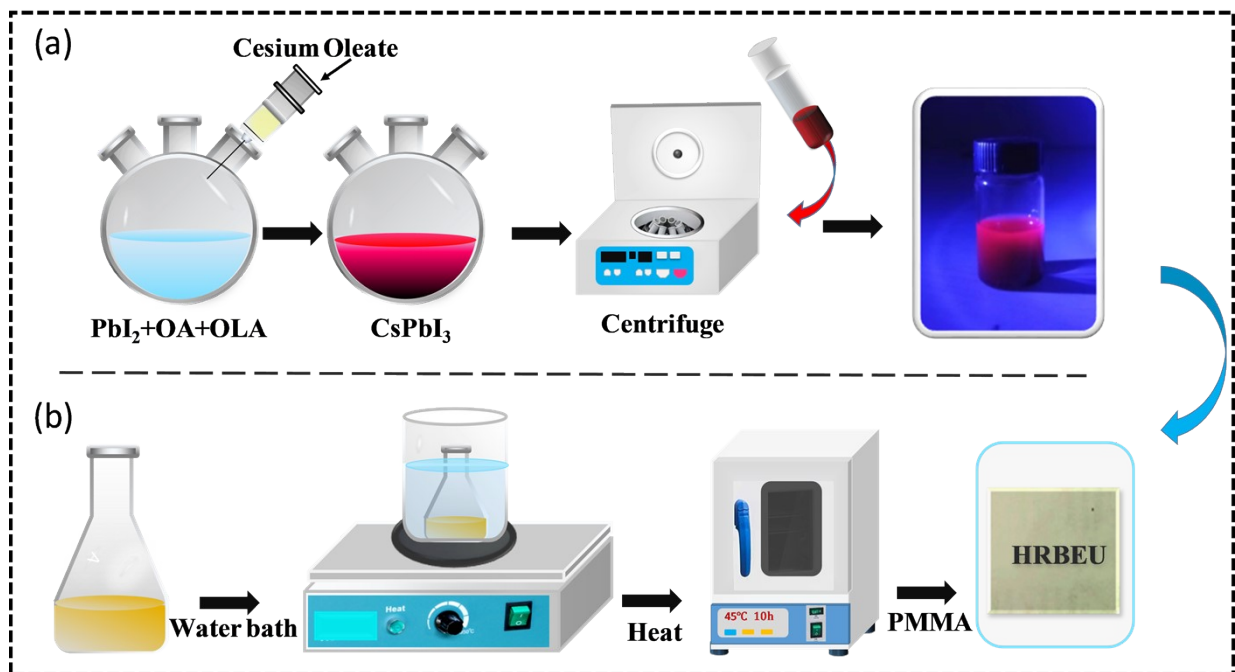

Fig. S1(a) Formation principle of the CsPbI<sub>3</sub> (b) Flow chart of organic glass fabrication.

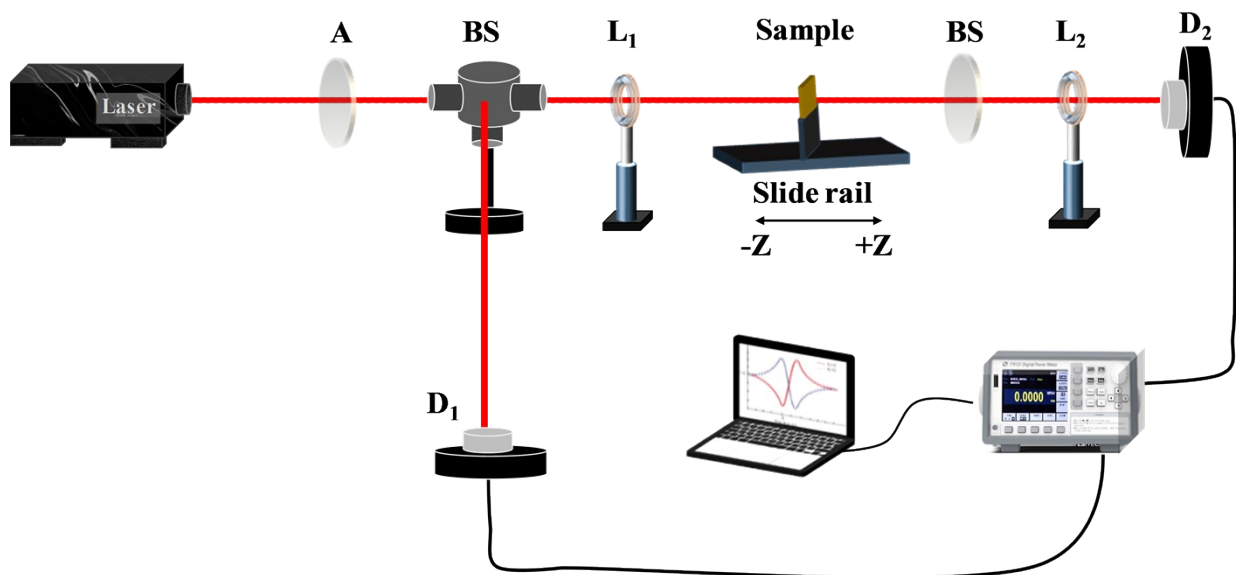

Fig. S2 The scheme of the Z-scan experimental setup.

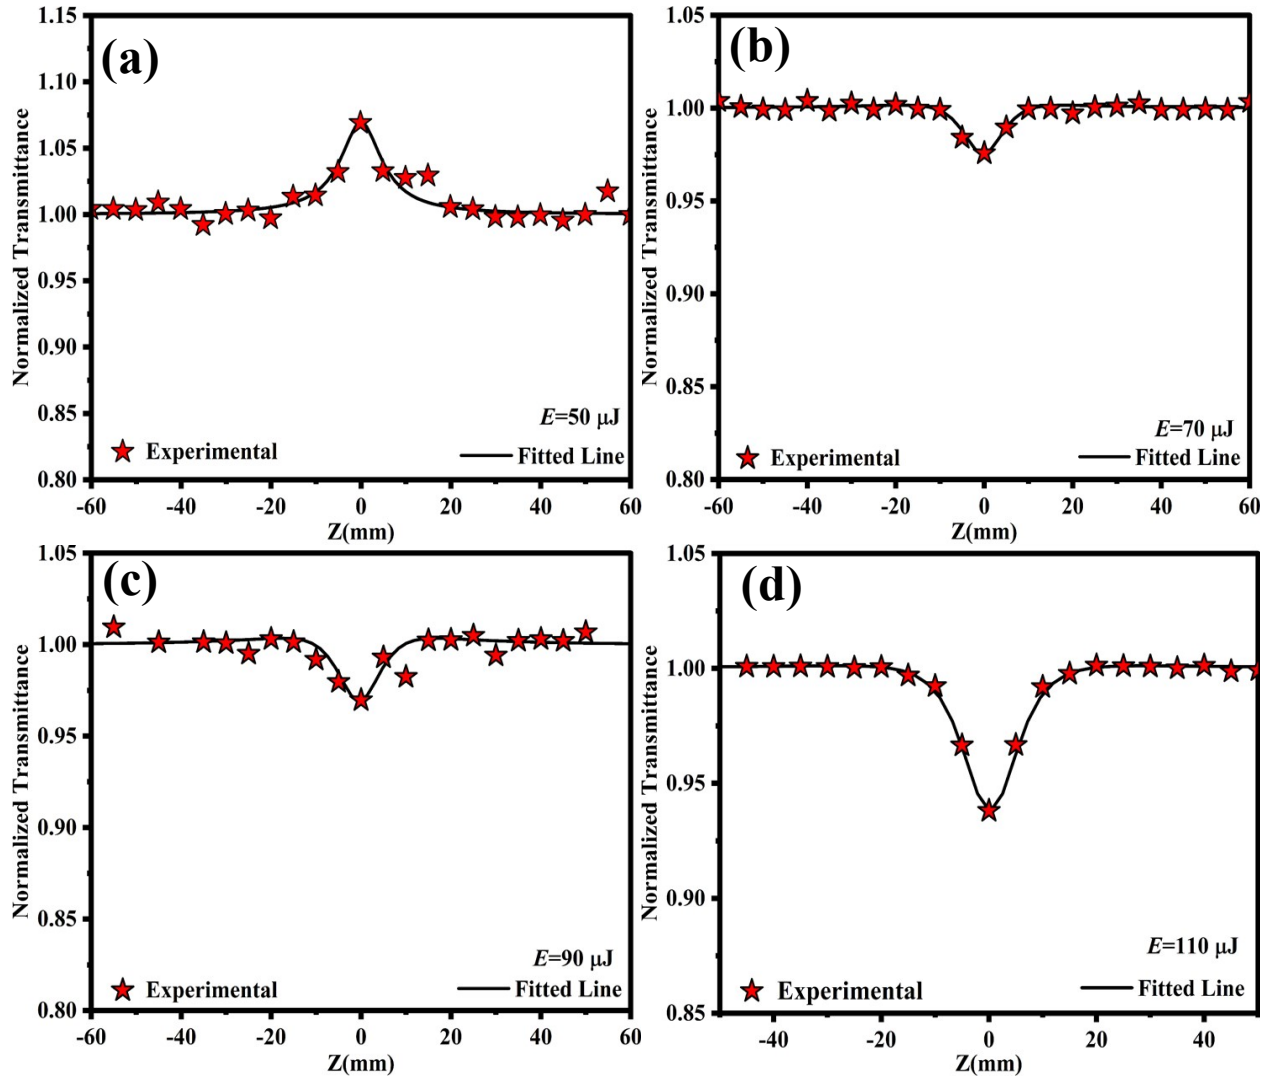

Fig S3. (a)-(d) NLA curve of  $(\text{CsPbI}_3)_2/\text{PMMA}$  organic glass at 50–110  $\mu\text{J}$ .

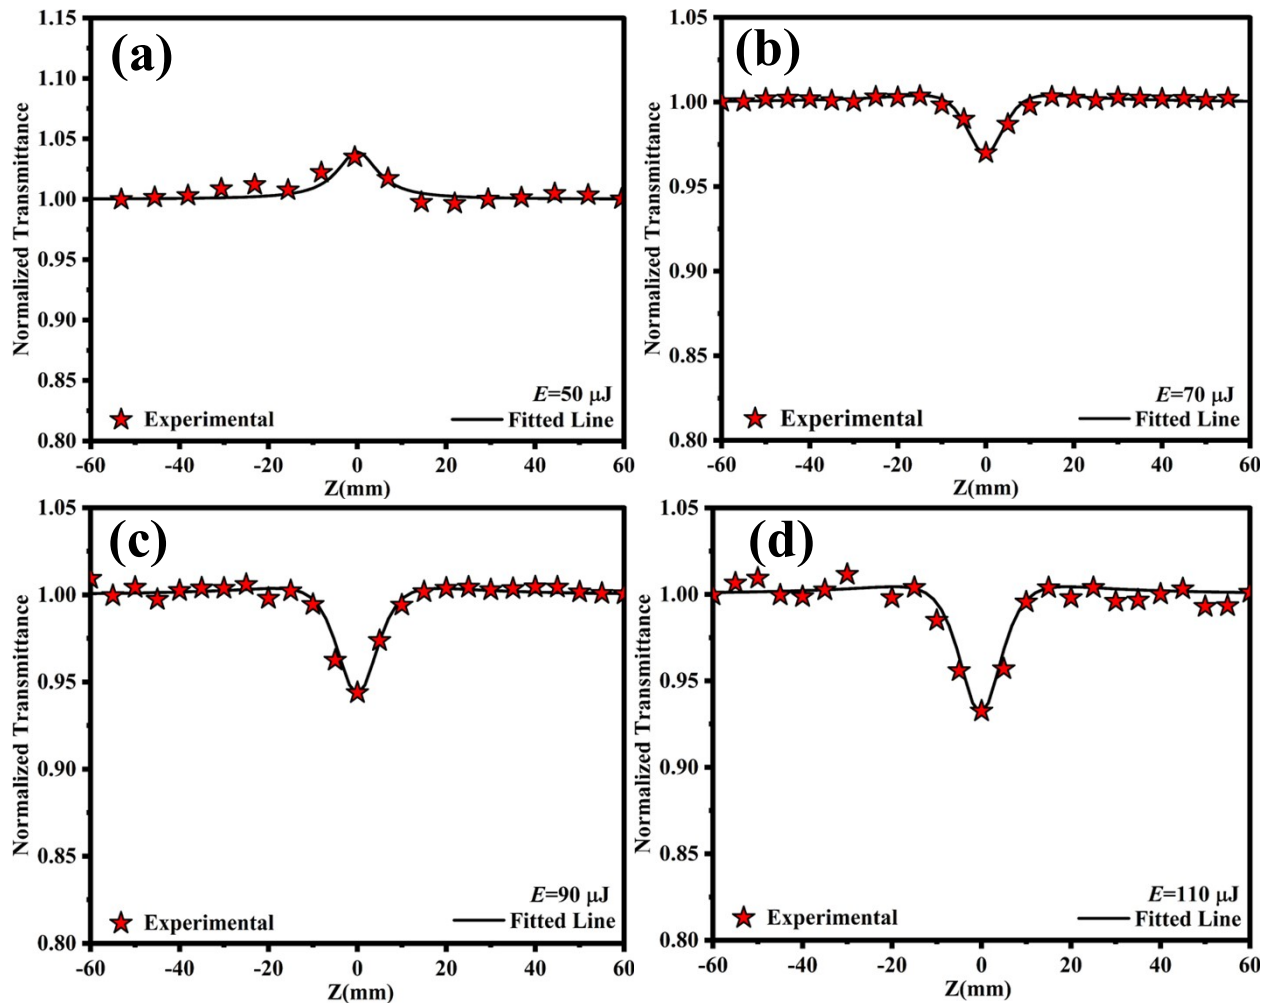

Fig S4. (a)-(d) NLA curve of  $(\text{CsPbI}_3)_4/\text{PMMA}$  organic glass at 50–110  $\mu\text{J}$ .

**Table S1** The  $I_0$ ,  $I_s$  and  $\beta$  of  $(\text{CsPbI}_3/\text{PMMA})_2/\text{PMMA}$  OG with input energy of 50–110  $\mu\text{J}$ .

| $E(\mu\text{J})$ | $I_0(\text{Wm}^{-2})$ | $I_s(\text{Wm}^{-2})$ | $\beta(\text{mW}^{-1})$ |
|------------------|-----------------------|-----------------------|-------------------------|
| 50               | $2.06 \times 10^{12}$ | $1.50 \times 10^{12}$ | $-8.70 \times 10^{-11}$ |
| 70               | $2.89 \times 10^{12}$ | $1.65 \times 10^{12}$ | $6.10 \times 10^{-11}$  |
| 90               | $3.72 \times 10^{12}$ | $1.40 \times 10^{12}$ | $5.70 \times 10^{-11}$  |
| 110              | $4.55 \times 10^{12}$ | $1.50 \times 10^{12}$ | $7.30 \times 10^{-11}$  |

**Table S2** The  $I_0$ ,  $I_s$  and  $\beta$  of  $(\text{CsPbI}_3/\text{PMMA})_4/\text{PMMA}$  OG with input energy of 50–110  $\mu\text{J}$ .

| $E(\mu\text{J})$ | $I_0(\text{Wm}^{-2})$ | $I_s(\text{Wm}^{-2})$ | $\beta(\text{mW}^{-1})$ |
|------------------|-----------------------|-----------------------|-------------------------|
| 50               | $2.06 \times 10^{12}$ | $1.70 \times 10^{12}$ | $-4.3 \times 10^{-11}$  |
| 70               | $2.89 \times 10^{12}$ | $2.60 \times 10^{12}$ | $1.40 \times 10^{-10}$  |
| 90               | $3.72 \times 10^{12}$ | $2.40 \times 10^{12}$ | $1.53 \times 10^{-10}$  |
| 110              | $4.55 \times 10^{12}$ | $2.50 \times 10^{12}$ | $1.43 \times 10^{-10}$  |
